# Supplementary material for: Unveiling tissue-specific transcriptional adaptations in iPSC-derived fibroblasts via co-culture systems
Source: Springer Nature journal article supplement (doi:10.1186/s13287-025-04537-6), 2025-07-30
Supplement: MOESM1 [file 13287_2025_4537_MOESM1_ESM.pdf › 13287_2025_4537_MOESM1_ESM.pdf]

## SUPPLEMENTARY INFORMATION

### Unveiling Tissue-Specific Transcriptional Adaptations in iPSC-Derived Fibroblasts via Co-Culture Systems

*Amar J. Azad<sup>1</sup>, Alessandro Bentivogli<sup>1</sup>, Henrike Germar<sup>1</sup>, Dana Wörz<sup>1</sup>, Elena Lizunova<sup>1</sup>, Max J. Cumberland<sup>2</sup>, January Weiner<sup>3rd 1</sup>, Sarah Hedtrich<sup>1,3,4,5</sup>*

<sup>1</sup> Berlin Institute of Health at Charité, Berlin, Germany

<sup>2</sup> The Westmead Institute of Medical Research, Westmead, New South Wales, Australia

<sup>3</sup> School of Biomedical Engineering, The University of British Columbia, Vancouver, Canada

<sup>4</sup> Faculty of Pharmaceutical Sciences, The University of British Columbia, Vancouver, BC, Canada

<sup>5</sup> Centre for Blood Research & Life Science Institute, University of British Columbia, Life Sciences Centre, Vancouver, British Columbia, Canada.

**Corresponding Authors:** Dr. Amar Azad, Current Address: Berlin Institute of Health at Charité, *Käthe-Beutler-Haus*, Berlin, Germany. Email: [amar\\_azad@outlook.com](mailto:amar_azad@outlook.com).

Prof. Dr. Sarah Hedtrich, Current Address: School of Biomedical Engineering, The University of British Columbia; 2350 Health Sciences Mall, Vancouver, BC V6T 1Z3, Canada. Email: [sarah.hedtrich@ubc.ca](mailto:sarah.hedtrich@ubc.ca); phone: +1-604-822-2466.

**Supplementary Table 1. Primer List**

| <b>Name</b> | <b>Sequence</b>             |
|-------------|-----------------------------|
| TBX20 FWD   | ggCgACggAgAACACAATCAA       |
| TBX20 REV   | CTgggCACAggACgACTTC         |
| MMP2 FWD    | TACAggATCATTggCTACACACC     |
| MMP2 REV    | ggTCACATCgCTCCAgACT         |
| HHIP FWD    | TCTCAAAgCCTgTTCCACTCA       |
| HHIP REV    | gCCTCggCAAgtgTAAAgAA        |
| NPNT FWD    | gTAAgCACAggTgCATgAACA       |
| NPNT REV    | gAACCATCCggCATgAgCATA       |
| BMP4 FWD    | ATgATTCCTggTAACCGAATgC      |
| BMP4 REV    | CCCCgTCTCAggTATCAAACCT      |
| CXCL12 FWD  | ATTCTCAAACTCCAAACTgTgC      |
| CXCL12 REV  | ACTTTAgCTTCgggTCAATgC       |
| FBLN1 FWD   | AgAgCTgCgAgTACAgCCT         |
| FBLN1 REV   | CgACATCCAAATCTCCggTCT       |
| POSTN FWD   | CACgCAAgtgCCATTATCTCTCCA    |
| POSTN REV   | ACCCACTCATATAgAAATgTgCAAAgC |
| KRT14 FWD   | ggCCTgCTgAgATCAAgtgACTAC    |
| KRT14 REV   | CACTgTggCTgTgAgAATCTTgTT    |
| 18S FWD     | CGCGGTTCTATTTTGTGTTGGT      |
| 18S REV     | AGTCGGCATCGTTTATGGTC        |

## Supplemental Figures

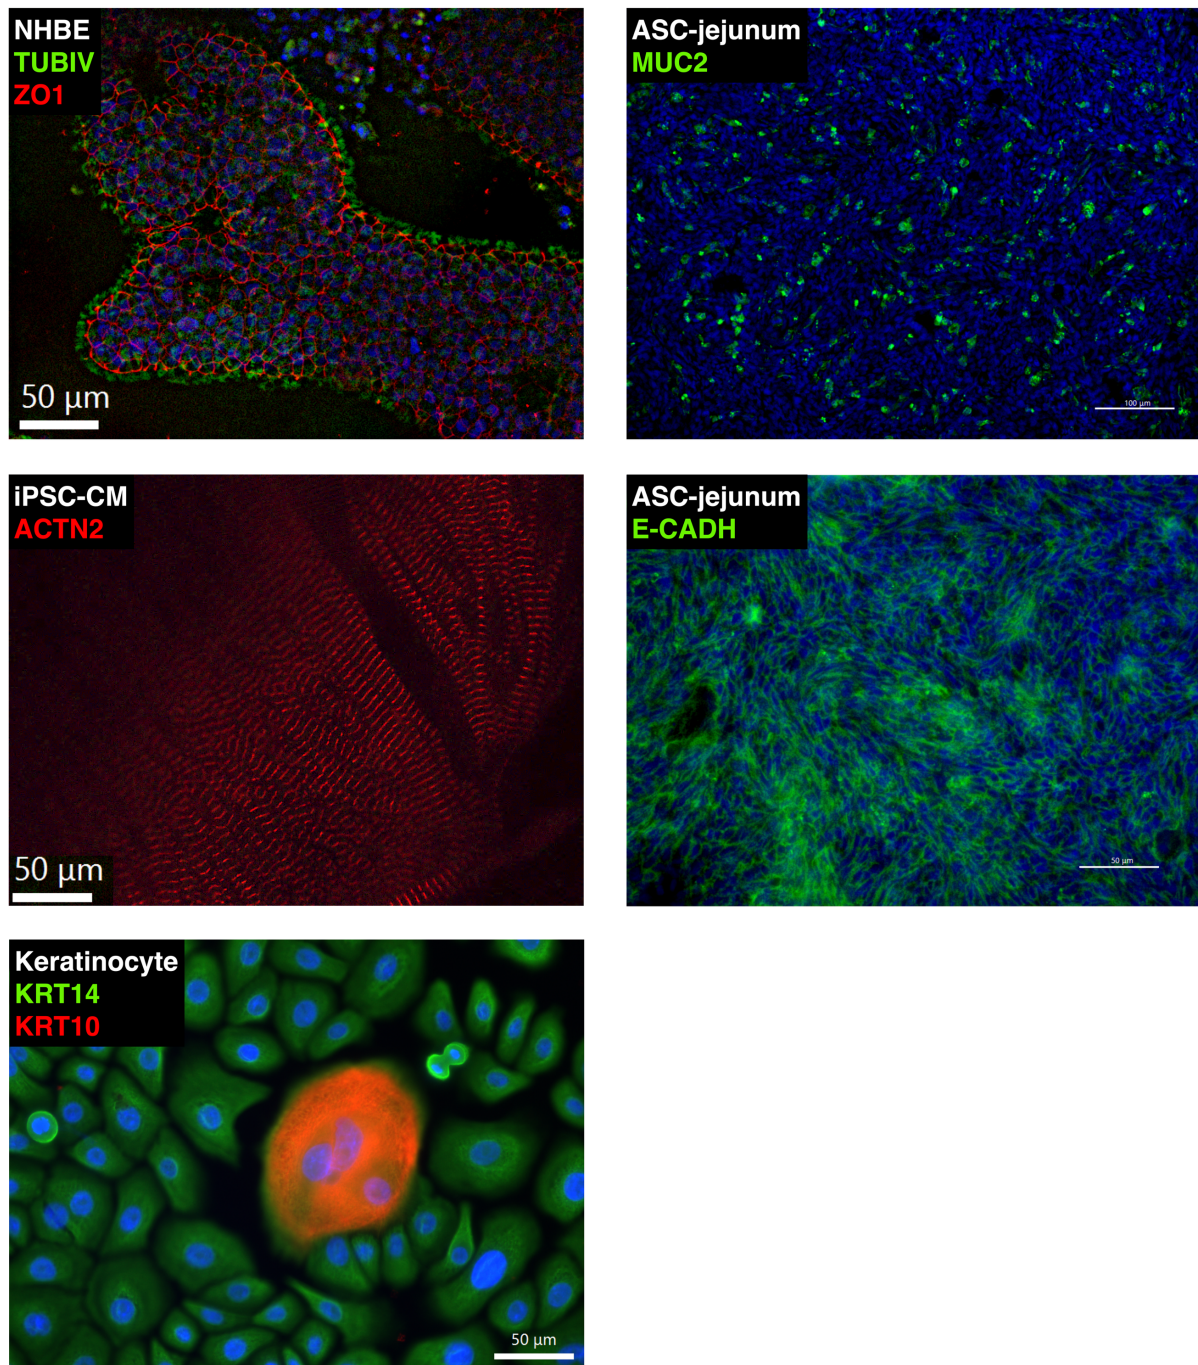

Supplementary Figure 1 Immunofluorescence characterisation of NHBE, iPSC-CM, ASC-derived jejunum and primary keratinocytes.

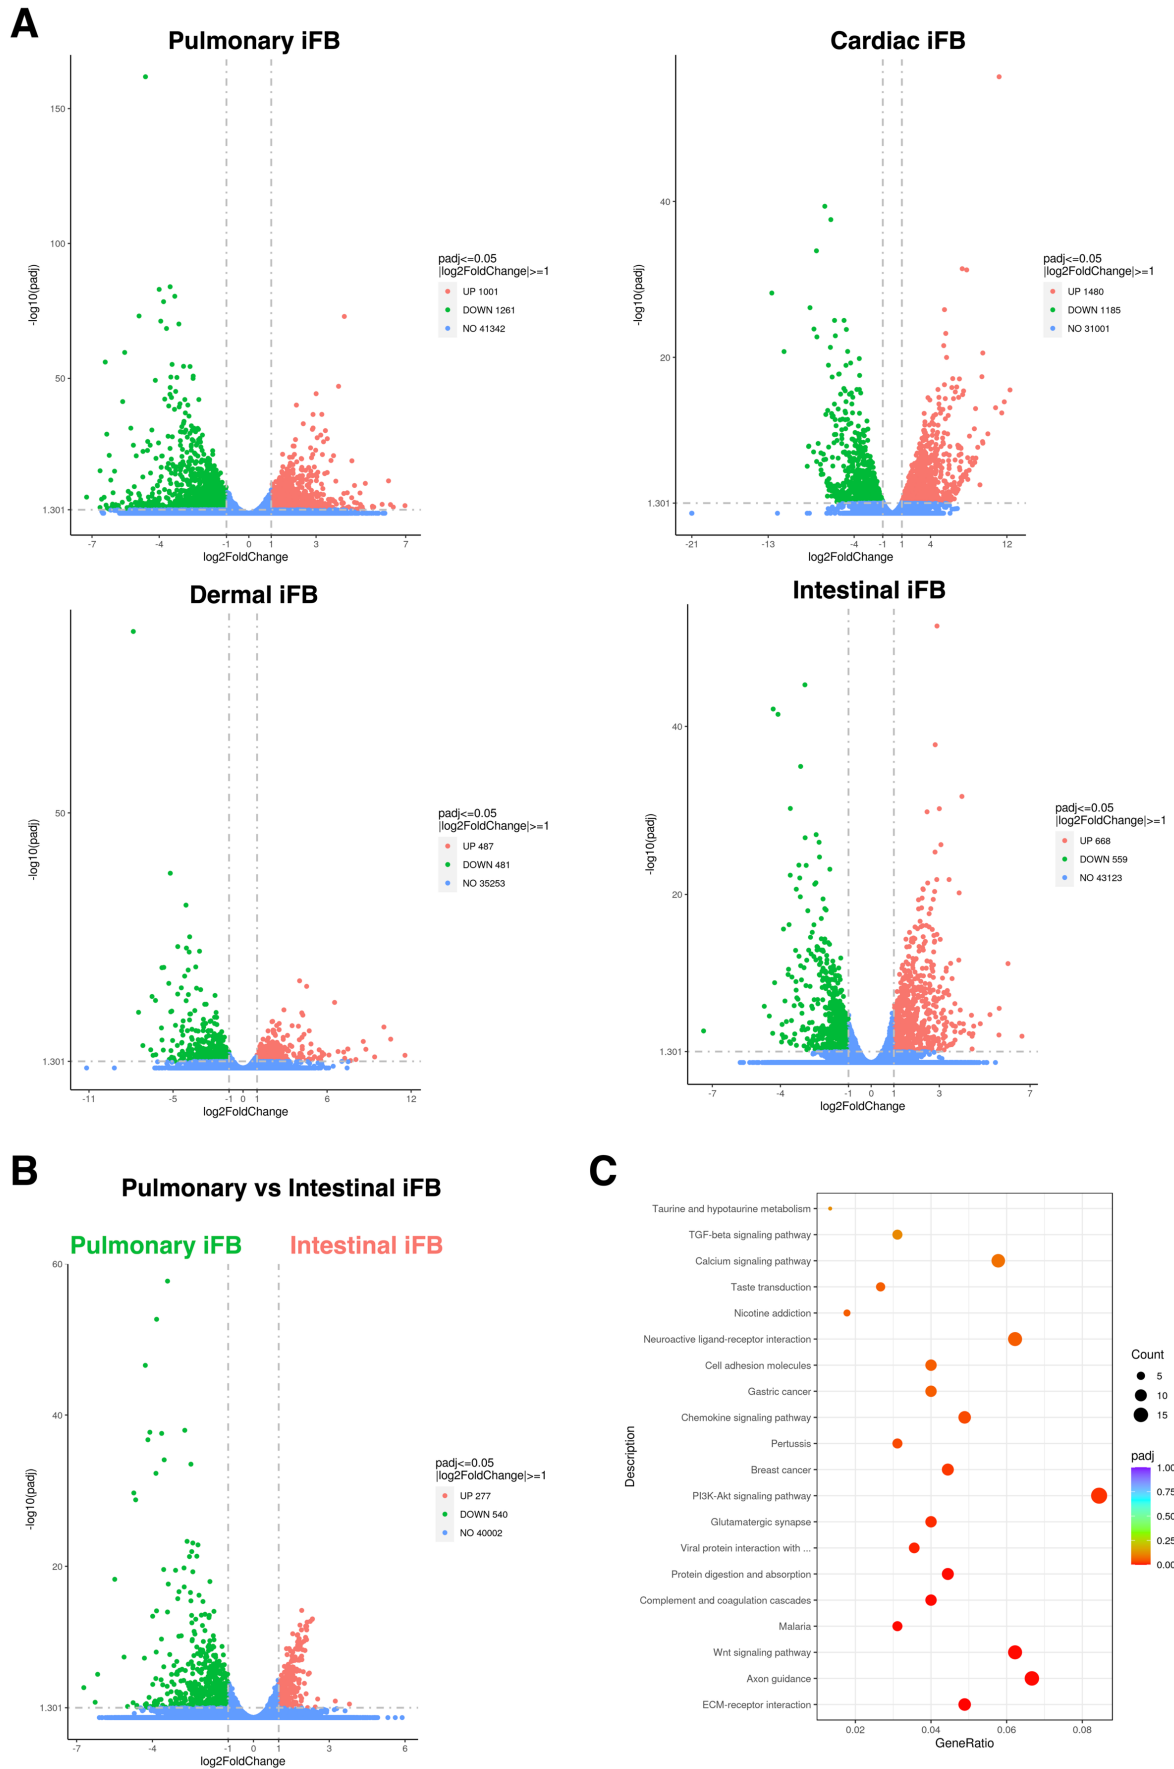

Supplementary Figure 2 (A) Volcano plots of co-cultured iFBs compared to non-co-cultured iFBs in the basal medium for co-culture. (B) Volcano plot comparing iFBs co-cultured with NHBEs with ASC-jejunal cells. (C) Dot plot depicting significantly upregulated KEGG pathways in ASC-jejunal-co-cultured iFBs compared to NHBE-co-cultured iFBs.



**A**

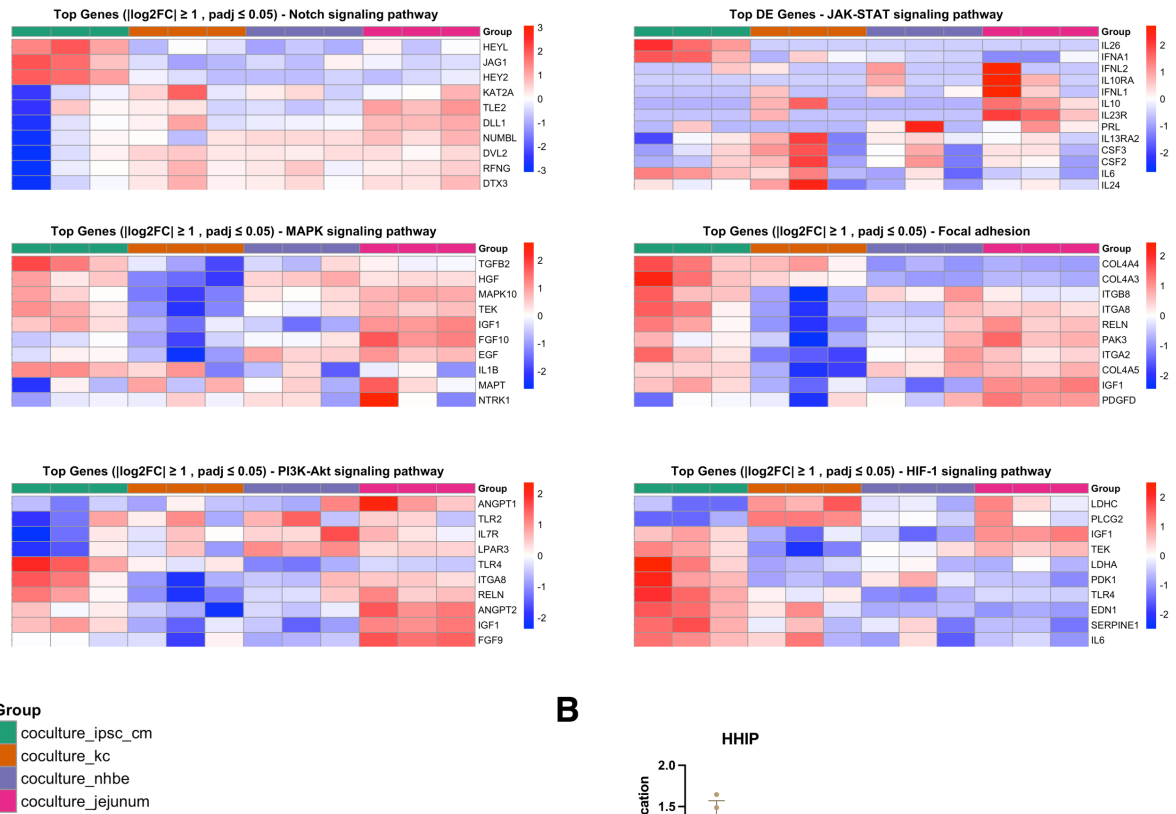

**B**

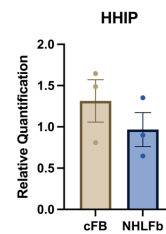

Supplementary Figure 3 (A) Heatmaps depicting the top 5 differentially expressed (DE) genes across key KEGG pathways. (B) HHIP transcript expression in primary cardiac fibroblasts (cFB) and normal human lung fibroblasts (NHLFb).

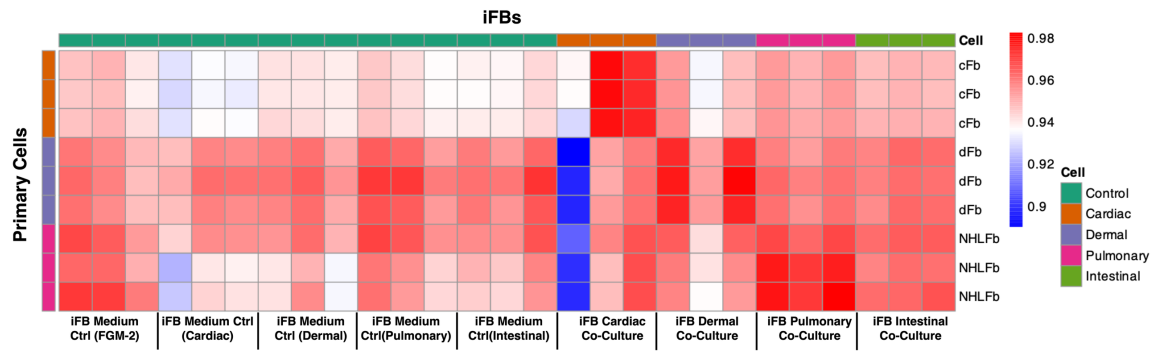

Supplementary Figure 4 Expression correlation heatmap comparing RNA-seq datasets of different culturing conditions of iFBs with cardiac (cFB), dermal (dFB), and normal human lung fibroblasts (NHLFs), demonstrating transcriptional overlap between iFBs with primary fibroblasts.
